# Supplementary material for: Variation for Composition and Quality in a Collection of the Resilient Mediterranean ‘de penjar’ Long Shelf-Life Tomato Under High and Low N Fertilization Levels
Source: Front Plant Sci. 2021 Apr 7;12:633957. doi: 10.3389/fpls.2021.633957 (PMC8058473; doi:10.3389/fpls.2021.633957)
Supplement: Supplementary Table 3 — Mean values of the three replicates per accession and treatment (n = 3 × 2 = 6) for all the traits evaluated. Acronyms LN and HN refer to low nitrogen and high nitrogen treatment, respectively. [file Table_3.xlsx]

## Sheet: Table S3
Table S3. Mean values of the three replicates per accession and treatment (n = 3 x 2 = 6) for all the traits evaluated. (Note: acronyms LN and HN refer to low nitrogen and high nitrogen treatment, respectively).
		SPAD		yield (kg/plant)		fruit weight (g)		L		chroma		hue		Fruit nitrogen content (g/kg dry matter)		Fruit carbon content (g/kg dry matter)		pH		soluble solids content (%)		titratable acidity (%)		Citric acid content (g/kg fresh weight)		Malic acid content (g/kg fresh weight)		Total acid content (g/kg fresh weight)		Citric:malic acid ratio		Fructose content (g/kg fresh weight)		Glucose content (g/kg fresh weight)		Total sugar content (g/kg fresh weight)		Frutose:glucose ratio		Total sweetness index		Soluble solids content:titratable acidity ratio		Total sugars:total acids ratio		Total sweetness index:titratable acidity ratio		Vitamin C content (g/kg fresh weight)
Accession name	Code	LN	HN	LN	HN	LN	HN	LN	HN	LN	HN	LN	HN	LN	HN	LN	HN	LN	HN	LN	HN	LN	HN	LN	HN	LN	HN	LN	HN	LN	HN	LN	HN	LN	HN	LN	HN	LN	HN	LN	HN	LN	HN	LN	HN	LN	HN	LN	HN
SL-ALCORA-1	AC1	51.7833	44.3667	1.85259	2.19485	74.9017	80.1733	33.9607	36.1787	17.8233	22.0767	37.213	31.9213	21.0147	19.303	405.333	406.667	4.06167	4.20167	5.61667	5.95	0.43	0.445	6.90183	5.08216	1.00241	1.00513	7.90424	6.08729	7.639	5.07469	20.7188	21.8009	19.0842	15.115	39.803	36.9158	1.0934	1.50165	4.55823	4.41886	13.848	13.4984	5.89068	6.07825	11.3418	9.95391	0.295234	0.270025
SL-ALGINET	AG1	48.9167	46.4667	2.16834	1.94633	76.6858	76.3408	34.7853	35.1067	20.2973	24.0727	46.3267	40.9667	24.6415	21.2683	406	400.667	3.925	3.91167	5.26667	5.5	0.736667	0.771667	8.17162	6.72675	0.928217	1.04077	9.09984	7.76752	8.78418	6.43705	17.5561	20.8753	13.9214	18.8865	31.4775	39.7619	1.26259	1.12388	3.69144	4.56668	7.42614	7.36195	3.50806	5.38901	5.10558	6.17565	0.291404	0.266443
SL-ALCALADEXIVERT-1	AX1	53.7667	50.3333	2.57667	2.76711	83.16	102.154	35.8553	33.8177	23.6933	22.9317	40.482	39.5193	23.923	22.5293	408.667	405	4.10167	4.08667	4.56667	4.55	0.426667	0.5	5.19742	4.727	1.26929	1.22428	6.46672	5.95128	4.13555	3.84129	13.6897	18.1735	10.5771	15.0551	24.2668	33.2287	1.30692	1.20624	2.85731	3.87022	10.8978	9.76208	4.06288	5.72854	6.97834	7.95095	0.231209	0.291985
SL-ALCALADEXIVERT-2	AX2	48.7833	45.9	1.75948	1.61065	60.5683	57.8917	42.141	40.4197	32.2833	33.2267	40.9017	36.7833	22.4873	20.926	405.667	407.333	4.03333	4.005	6.3	6.86667	0.461667	0.511667	5.48975	5.20816	1.78833	1.95797	7.27808	7.16613	3.06581	2.754	21.3521	23.8891	21.5175	23.3794	42.8696	47.2685	1.02897	1.02784	4.83815	5.3602	14.0519	13.5166	6.27345	6.66816	11.0256	10.5491	0.296877	0.314307
SL-ALCALADEXIVERT-3	AX3	52.2667	47.1333	2.02751	1.79645	52.1458	64.1642	39.774	36.979	29.1233	26.3867	33.6627	29.2687	18.423	19.3313	407.667	408	4.105	4.34167	6.58333	6.48333	0.496667	0.536667	5.13946	5.79013	1.41914	1.58017	6.55859	7.3703	3.59583	3.66855	20.7992	22.1612	19.6903	20.926	40.4894	43.0872	1.10707	1.06634	4.61634	4.91456	13.6974	12.3158	6.51457	5.99029	9.89028	9.38435	0.310182	0.280469
SL-ARANYUEL-1	AY1	46.1	53.0167	1.9977	1.89779	80.7908	80.4992	33.369	35.7427	19.1017	21.3663	31.862	35.6217	22.944	20.448	407.667	407.333	4.265	4.23333	5.75	6.35	0.455	0.638333	6.25019	4.89294	1.47656	1.43531	7.72675	6.32826	4.20583	3.5049	17.6448	19.3762	16.7458	18.3476	34.3906	37.7238	1.06722	1.10395	3.9194	4.30085	12.8917	11.3763	4.88388	6.0539	8.83983	7.90062	0.274517	0.310948
SL-BENLOCH-1	BL1	56.25	45.8833	2.11202	1.75145	77.395	73.6317	37.4533	33.4417	23.1093	20.8977	32.785	32.7433	20.8427	21.201	412	409.333	4.12	4.35667	5.96667	6.05	0.553333	0.493333	5.78744	5.52764	1.66231	1.4799	7.44975	7.00754	3.38235	3.78413	17.5365	19.3917	15.7438	17.1847	33.2803	36.5764	1.15885	1.13251	3.827	4.2148	11.5156	12.4505	5.30923	5.39476	7.61094	8.72089	0.329013	0.316038
MANACOR F1	C1	50.5833	45.85	2.65404	1.84733	85.1442	66.9025	34.3707	36.2653	16.8603	19.031	36.5003	38.4643	20.4233	17.648	409	403.667	3.98167	3.825	5.65	6.71667	0.705	0.805	7.47701	7.89243	1.01152	1.14412	8.48853	9.03655	7.52708	6.87836	22.7191	23.0487	19.9604	22.2356	42.6795	45.2843	1.13809	1.04134	4.92485	5.14722	7.99998	8.43757	5.06823	5.19155	7.01698	6.50739	0.240537	0.29744
PALAMOS F1	C2	44.6167	38.7167	2.88504	1.86048	83.6683	70.575	35.8787	36.0997	20.1443	19.405	37.325	44.01	19.439	20.86	405.667	403.667	3.89333	3.86	5.55	4.61667	0.673333	0.641667	7.7926	6.91303	1.06035	0.944921	8.85294	7.85795	7.36136	7.23856	18.5414	16.307	15.6753	14.3277	34.2168	30.6347	1.18837	1.16293	3.97254	3.53495	8.66236	7.18333	3.96974	4.1572	6.30641	5.58597	0.24355	0.217248
DOMINGO	C3	47.3667	51.4333	2.5914	2.49947	64.76	59.1233	38.3683	38.086	18.5763	18.1643	46.919	41.93	18.2387	14.61	405.667	398.667	4.28333	3.89667	4.91667	4.76667	0.533333	0.581667	8.48288	6.27417	1.77687	1.66145	10.2597	7.93562	4.66831	4.17946	18.8339	17.9214	13.6514	14.073	32.4853	31.9943	1.37726	1.307	3.86259	3.75775	9.26986	8.20019	3.32162	4.28943	7.17121	6.52821	0.257699	0.213598
MALLORQUÍN	C4	41.6333	36.3833	1.70886	2.2367	97.8413	99.9858	33.7385	34.3573	19.161	22.2843	34.54	35.7537	25.3535	26.554	404	396.5	4.1275	4.06333	4.95	4.76667	0.53	0.651667	5.92578	5.34585	1.28185	1.34224	7.20763	6.68809	4.62319	3.98733	14.3196	20.0576	11.0411	17.9153	25.3608	37.9729	1.29617	1.14374	2.98707	4.37021	9.35088	7.50446	3.52734	5.90302	5.65303	7.00906	0.161105	0.247152
JORBA	C5	40.6667	43.9833	0.936931	1.23267	40.5733	51.8667	41.217	37.4073	27.5973	27.3223	34.8143	30.643	23.7475	26.5155	409	390.5	4.19333	4.04333	5.71667	4.58333	0.668333	0.658333	6.31215	5.47147	1.63992	1.71189	7.95206	7.18336	4.13812	3.25032	14.872	17.2608	10.4307	14.8792	25.3027	32.14	1.46372	1.30458	3.02353	3.71994	8.59901	7.17125	3.1964	4.60904	4.56151	6.10643	0.153475	0.233064
SL-CASTELLFORT-3	CF3	52.4	51.7833	2.51754	2.20698	81.61	84.7975	34.8413	35.7323	22.371	23.3817	42.025	42.8697	18.9203	19.7323	407	405.667	4.01667	4.25167	4.86667	5.08333	0.445	0.428333	4.88907	4.50915	1.47603	1.35055	6.3651	5.8597	3.31918	3.33725	16.2231	19.9576	12.708	16.5291	28.931	36.4866	1.29057	1.21088	3.39927	4.24984	11.3	12.064	4.92604	6.29619	8.02208	10.002	0.24207	0.267978
SL-CHELVA	CH1	44.7167	39.95	2.24237	1.90167	76.12	66.5167	38.701	36.86	19.695	20.8243	43.0533	38.8593	18.1863	16.1553	406	401	4.39667	4.30833	6.06667	6.53333	0.508333	0.695	6.11264	7.78588	1.94314	2.35613	8.05578	10.142	3.10096	3.31998	21.7697	27.5028	16.9826	24.0083	38.7523	51.5111	1.28716	1.14558	4.55613	5.95005	12.998	9.6021	5.17728	5.20483	10.0107	8.76671	0.297448	0.279375
SL-CINCTORRES-2	CI2	53.25	49.75	1.89737	1.72018	57.4333	59.9133	36.9343	33.1987	23.9297	20.4153	38.69	30.7413	20.446	21.327	408.667	407	4.14667	4.09333	5.85	5.78333	0.423333	0.541667	4.55417	4.65253	1.6972	1.59424	6.25137	6.24677	2.6863	2.9629	19.8698	21.5357	17.9459	20.2248	37.8157	41.7605	1.12348	1.06763	4.34436	4.76744	13.8825	10.7381	6.32422	6.80345	10.3983	8.84486	0.267363	0.270756
SL-COCENTAINA-1	CO1	51.6	49.2	2.61812	2.03534	76.695	64.2617	39.4807	35.3567	18.6333	17.28	49.9883	38.5667	21.117	20.259	412	404.667	4.085	4.47667	5.56667	6.45	0.495	0.461667	5.90613	5.48878	0.962114	0.970342	6.86824	6.45912	6.13841	5.74013	17.6716	24.4638	16.1184	21.4844	33.79	45.9482	1.10177	1.16582	3.87574	5.30239	11.2496	14.0245	5.03059	7.10836	7.83216	11.5143	0.236209	0.306158
SL-FANZARA-2	FA2	45.6667	47.7333	2.32931	1.80143	39.8242	38.5992	43.2867	39.293	22.361	21.594	47.5093	39.0993	20.8393	20.889	413	416.667	3.96	4.355	5.53333	5.48333	0.596667	0.496667	6.72597	5.71342	1.45737	1.28677	8.18334	7.00019	4.56693	4.42838	20.5116	20.0804	16.6365	10.9897	37.1481	31.0702	1.25419	1.92649	4.34112	3.84728	10.5673	11.1303	4.86524	4.40159	7.81759	7.82085	0.246842	0.220279
SL-FIGUEROLES-1	FI1	46.8	49.0333	3.0644	3.896	132.519	134.585	39.4133	35.4465	20.984	20.1925	43.611	40.621	20.7153	18.6005	410.333	408.5	3.97833	4.385	4.56667	4.71667	0.546333	0.533333	8.32443	6.94695	1.99596	1.45951	10.3204	8.40647	4.23995	4.65808	15.3969	19.3618	10.2648	14.5492	25.6617	33.9111	1.49902	1.33007	3.08966	4.01002	8.44425	8.98987	2.48806	4.40858	5.76792	7.62174	0.284533	0.28609
SL-LAJANA-1	LA1	48.1	52.85	2.35995	1.83579	79.7708	61.4108	36.6617	38.2973	14.686	20.4583	51.21	39.6083	21.824	22.395	408	404.333	4.05833	4.225	5.16667	5.13333	0.415	0.4	4.61699	5.50373	0.747316	0.961386	5.36431	6.46511	6.19766	5.71097	17.1368	22.5514	15.9568	19.635	33.0936	42.1865	1.07393	1.14413	3.78324	4.87498	12.6223	12.7555	6.30848	6.55086	9.25975	12.3202	0.219647	0.294094
SL-LAJANA-2	LA2	46.9667	47.8333	2.00146	2.05446	63.0533	65.03	36.259	35.332	22.6137	19.2293	35.782	40.4993	21.915	19.877	407.333	406.667	4.11667	4.09167	6.01667	6.31667	0.543333	0.558333	6.42493	7.31614	0.99402	1.18365	7.41895	8.49979	6.38933	6.53431	19.0281	22.0613	16.7062	18.0069	35.7343	40.0682	1.13496	1.22594	4.12389	4.67772	11.7851	11.9982	5.05945	4.90479	8.0172	9.06232	0.290138	0.310583
SL-LLIRIA-1	LL1	49.1333	50.1833	2.04105	1.82202	73.8925	64.56	34.7007	37.0287	18.9613	24.3393	38.89	39.7043	22.2263	20.5293	412.333	408.667	4.32	4.37833	5.45	4.98333	0.445	0.455	5.29054	6.33386	1.15728	1.71482	6.44781	8.04868	4.76644	3.71206	19.227	23.3711	15.8834	18.6872	35.1105	42.0582	1.20979	1.25304	4.09119	4.92588	12.8769	10.9753	5.62619	5.2987	9.69901	10.9776	0.301244	0.299713
SL-LLIRIA-2	LL2	47.8833	44.1833	1.72877	1.78048	61.105	57.6033	38.0777	36.7347	18.9057	21.8983	43.9467	38.84	18.342	18.3397	408.333	408.333	4.10167	4.24833	5.83333	5.65	0.546667	0.496667	6.5148	6.17035	1.53495	1.73603	8.04975	7.90638	4.27211	3.57394	18.4688	22.7561	15.1635	18.845	33.6323	41.6011	1.21982	1.21148	3.92275	4.84564	11.0661	11.6517	4.26	5.25937	7.5264	10.0356	0.242534	0.307764
SL-MONTAN-1	MO1	47.3833	44.7833	2.62214	2.88739	117.803	126.861	40.0783	33.6703	24.524	18.5907	44.0793	36.5307	22.9317	20.02	404.667	399	4.35167	4.49667	5.6	5.96667	0.393333	0.37	4.75846	5.95191	0.975525	1.4211	5.73399	7.37301	6.06501	4.11103	17.8047	22.6941	17.6671	20.1013	35.4717	42.7955	1.01391	1.13093	4.01339	4.93182	14.7363	16.4099	6.20411	6.25306	10.6665	13.6488	0.251978	0.375325
SL-MONTAN-2	MO2	49.1667	56.7167	2.90302	2.00419	86.4725	70.325	38.9907	31.2337	20.1667	15.2983	45.7377	43.94	18.2355	19.085	407	408.333	4.62667	4.01833	4.28333	5.18333	0.556667	0.486667	5.60986	5.33651	1.79524	1.72753	7.4051	7.06405	3.16534	3.11774	18.906	20.7949	12.4401	17.0314	31.3461	37.8263	1.60778	1.24847	3.78135	4.41363	8.24193	10.6264	4.31314	5.40594	7.01851	9.16866	0.274446	0.282583
SL-MONTROI-1	MT1	52.6333	55.2	3.13067	2.4817	28.9692	29.305	43.0577	39.5257	27.6733	26.9167	51.321	44.3033	19.7763	16.6247	413.333	411.667	3.86833	3.95	5.23333	5.95	0.665	0.731667	5.65726	5.63512	1.72245	1.3989	7.37971	7.03402	3.3016	4.34037	20.6555	20.7575	16.4322	18.0979	37.0877	38.8554	1.25387	1.17865	4.34717	4.48907	8.05681	8.43336	5.14202	5.57083	6.62478	6.35273	0.253078	0.207856
SL-PEGO-1	PG1	49.0333	49.75	2.07752	1.52563	41.9342	47.7883	39.0857	38.3987	24.5557	25.4297	48.2953	46.1133	17.217	18.1363	408.667	411	4.01833	4.06333	4.71667	4.01667	0.653333	0.545	7.72031	7.92395	1.90101	1.8897	9.62132	9.81365	4.09882	4.17508	18.2944	16.6665	13.3235	12.2966	31.6179	28.9631	1.3772	1.3599	3.75675	3.43452	7.1977	7.34688	3.30529	3.10812	5.73448	6.46668	0.26847	0.251171
SL-SALZADELLA-2	SA2	51.85	54.45	1.5856	1.84832	83.7117	93.1958	36.0483	37.2617	21.8417	21.7363	35.7997	37.145	21.2997	21.715	410.333	407	4.04833	3.95	5.56667	5.93333	0.693333	0.606667	8.64603	6.73051	0.963395	0.8343	9.60943	7.56481	8.91606	8.01192	17.606	17.8387	14.9479	17.5558	32.5539	35.3945	1.1795	1.02371	3.77695	4.01005	8.12186	9.91623	3.46391	4.88152	5.4872	6.80669	0.261674	0.272213
SL-SANTMATEU-2	SN2	50.5833	51.25	2.06419	1.76513	69.8067	64.2658	34.529	36.645	24.7607	24.84	36.961	42.1377	19.7997	20.081	407.333	408.333	4.15167	4.055	5.43333	6.1	0.578333	0.473333	5.33812	4.49552	0.733975	1.3192	6.0721	5.81471	8.03473	3.38964	16.7058	22.0339	9.56927	18.2879	26.2751	40.3217	1.88414	1.20916	3.23313	4.69496	9.55926	13.6363	4.31347	7.47622	5.71865	10.7307	0.270447	0.299308
SL-SONEJA-1	SO1	48.2333	43.9833	2.52709	1.91589	94.2767	80.4417	33.394	35.8843	18.7327	22.6823	33.609	34.109	20.9033	22.3347	404	405.333	4.12167	3.84833	4.28333	5.23333	0.67	0.723333	8.37898	8.36586	0.894588	0.963209	9.27357	9.32907	9.86993	8.77447	15.295	19.9057	11.8556	17.7069	27.1506	37.6126	1.28546	1.12946	3.19527	4.33158	7.01835	7.62765	3.18477	4.18008	5.15024	6.273	0.226769	0.245236
SL-TRAIGUERA-1	TA1	52.7833	56.85	2.33931	1.94338	78.5917	68.2142	33.5273	35.0073	18.3773	20.8363	38.574	35.164	22.2653	17.862	409	407.667	4.08	3.88833	5.75	5.7	0.523333	0.618333	6.57307	9.14188	0.916623	0.972973	7.48969	10.1149	7.13939	9.11317	18.5063	23.0839	16.5309	20.526	35.0373	43.6099	1.12805	1.12189	4.0323	5.02256	11.249	9.52089	4.87465	4.90453	7.98458	8.32372	0.320362	0.308726
SL-TEULADA-1	TE1	48.7	47.9167	1.85161	1.60853	49.2167	46.7167	40.9263	35.9577	22.2673	17.855	44.106	41.1323	21.3877	18.2827	410.333	405.333	4.07667	3.91333	5.75	5.48333	0.748333	0.698333	12.2842	8.82725	1.31634	1.00305	13.6005	9.8303	9.88244	9.06004	18.1555	21.991	12.7501	17.0195	30.9056	39.0106	1.43422	1.29052	3.69233	4.59214	7.68678	8.25038	2.28728	4.05757	4.92253	6.80302	0.289684	0.278631
SL-TEULADA-2	TE2	50.5	47.0667	2.16151	1.97851	69.7558	63.9192	38.5557	34.0267	20.6173	19.2153	44.0207	40.3233	19.393	19.0483	406	404.667	4.04833	4.02167	5.66667	6.71667	0.638333	0.58	7.84076	5.95173	0.890398	0.986434	8.73116	6.93817	8.65165	6.06007	18.6602	23.5787	15.9976	21.2945	34.6577	44.8732	1.17237	1.11463	4.01484	5.15518	9.59126	12.086	4.41286	6.83135	6.96223	9.53397	0.240912	0.313987
SL-TORREBAIXA-1	TO1	48.5333	53.7833	1.64921	1.29463	52.9542	48.0192	33.5377	31.2757	19.3843	15.469	40.1993	37.98	22.3427	18.8363	416.333	405.667	3.985	4.065	5.11667	5.68333	0.955	0.705	10.5226	8.6828	1.05593	1.064	11.5785	9.7468	10.0184	8.16752	19.2866	22.4679	11.2009	18.1781	30.4875	40.646	1.77504	1.24131	3.74426	4.75173	5.73578	9.34653	2.67461	4.49994	4.13826	7.64854	0.389539	0.338553
SL-TORREDENDOMENECH-1	TR1	52.3833	60.9	3.18216	2.68616	84.5075	78.9558	36.7723	32.4783	24.9263	21.542	50.434	38.1717	20.4173	19.7903	407	406.333	4.10167	4.03833	4.4	4.56667	0.391667	0.573333	4.76526	4.30504	1.32093	1.24484	6.08619	5.54988	3.58356	3.48217	16.2144	17.6521	13.106	14.3714	29.3205	32.0235	1.24108	1.22836	3.42822	3.74004	11.4703	9.499	5.05283	5.83825	9.02984	7.6432	0.238386	0.270096
SL-VIVER-1	UV1	48.9333	40	2.1471	2.12389	63.2183	64.2992	33.4353	35.1507	19.8177	20.719	35.0967	38.915	21.8053	18.1267	406	404.667	3.83	3.99667	5.91667	6.48333	0.855	0.585	11.5711	7.46017	1.2987	1.0659	12.8698	8.52607	8.95714	7.08039	19.8873	23.4686	15.2888	20.6705	35.1761	44.1391	1.30768	1.1471	4.14504	5.09124	7.30748	11.7956	2.72587	5.4337	5.12204	9.61524	0.323126	0.300193
SL-VALLDALBA-1	VA1	54.7667	56.55	1.58236	1.78311	80.6425	70.82	36.0527	35.7407	23.4723	22.6713	30.5313	30.761	22.89	19.7223	412.667	412.333	4.34667	4.31	5.96667	5.95	0.496667	0.485	5.95015	4.7346	1.56864	1.384	7.5188	6.1186	3.76208	3.43187	15.1473	21.4891	12.639	20.4624	27.7864	41.9514	1.21835	1.05828	3.23267	4.7785	12.446	13.7296	3.77574	6.93805	6.68389	10.9842	0.264553	0.298954
SL-VILLAHERMOSADELRIO-1	VH1	50.5833	54	1.48037	1.75288	57.42	58.2567	33.8603	33.3877	18.5793	18.775	35.7717	37.1017	21.486	18.3717	404.667	401.667	4.12333	4.25667	5.33333	5.85	0.52	0.535	6.04359	4.90233	1.67394	1.50785	7.71753	6.41018	3.61658	3.2595	19.8535	20.1295	15.2966	16.4213	35.1501	36.5508	1.3106	1.23712	4.14057	4.26745	10.3798	11.3165	4.56018	5.80236	8.31137	8.34564	0.273433	0.358543
SL-VILLAHERMOSADELRIO-2	VH2	55.15	58.45	2.02123	2.03625	68.345	69.275	33.4277	34.018	22.325	21.4983	39.5543	41.1067	19.7263	19.5	413.667	408.333	4.05333	3.88333	6.1	5.61667	0.646667	0.825	7.03597	7.97788	0.824769	0.922248	7.86074	8.90013	8.3744	8.65853	21.7067	19.6683	16.7388	17.5332	38.4455	37.2015	1.34178	1.13421	4.52816	4.28277	10.0865	6.84275	5.14367	4.49924	7.37114	5.20856	0.271703	0.266665
SL-VINAROS-1	VI1	53.6833	54.4	2.49364	2.12491	92.2233	87.1275	35.7797	34.261	24.9333	23.495	31.0383	32.6073	23.758	18.056	407	410.667	4.23667	3.825	5.95	6.35	0.86	0.848333	8.079	12.6622	1.19907	1.31289	9.27807	13.9751	6.95029	9.44295	20.5058	21.5353	17.4695	18.7334	37.9753	40.2687	1.17588	1.1582	4.40356	4.65403	7.04682	7.67601	4.2121	3.15301	5.19586	5.54257	0.285821	0.306469
SL-VINAROS-2	VI2	53.6833	51.1333	2.27843	1.73092	84.6342	76.9942	33.846	35.2007	18.91	22.6773	34.301	30.5813	22.8633	21.5963	404	410	4.475	4.05833	6.16667	5.7	0.508333	0.565	5.6734	5.42452	1.35769	1.64052	7.03109	7.06504	4.19502	3.25887	22.7743	23.7199	20.0913	22.8683	42.8656	46.5882	1.13775	1.04268	4.94308	5.29598	12.3093	11.0076	6.05039	7.06022	9.82575	10.0198	0.292351	0.35587
SL-VISTABELLA-1	VT1	47.9167	43.7167	2.0587	1.59215	73.7683	66.17	32.013	33.674	18.5367	19.068	35.598	34.0543	21.677	19.387	408.333	401.667	4.125	4.195	5.38333	6.05	0.501667	0.435	7.01554	5.73279	1.56078	1.1553	8.57632	6.88809	4.52642	5.74712	22.6385	21.4805	17.4397	17.2896	40.0782	38.7701	1.30227	1.36584	4.7212	4.53609	10.7867	14.1521	4.67728	5.76755	9.52258	10.7817	0.262816	0.303163
SL-XAVIA-1	XA1	44.6667	44.5	2.43402	1.35849	46.7142	45.84	33.8587	33.289	20.7	21.292	45.5167	40.299	23.7677	20.2797	407	407.333	4.11667	4.17	5.9	5.91667	0.671667	0.635	7.75003	5.50236	0.894518	0.950876	8.64455	6.45323	8.85763	5.74668	21.2624	21.1736	19.7792	19.9783	41.0416	41.1519	1.08533	1.07291	4.69258	4.69439	9.26728	9.54791	4.8695	6.73711	7.46287	7.5073	0.260577	0.28722
SL-XAVIA-2	XA2	55.0667	50.8333	1.65014	1.62493	62.8917	63.0642	35.9557	32.3183	19.1467	18.149	39.9347	39.3993	18.4863	20.2967	402.333	408.333	3.995	3.96167	6.26667	6.56667	0.566667	0.561667	6.38743	6.39047	1.01179	1.13567	7.39922	7.52614	6.38302	5.64028	22.1063	23.0776	19.5778	21.4846	41.6841	44.5622	1.14513	1.0775	4.80386	5.09447	11.0894	12.166	5.68106	6.15707	8.58714	9.35185	0.238983	0.280788
SL-XÉRICA-1	XE1	48.8667	46.7667	2.35013	2.34858	92.3467	97.7433	33.044	36.1793	20.6463	23.7557	31.416	33.5433	21.599	21.192	404.667	400	4.555	4.255	6.35	5.78333	0.338333	0.441667	4.22204	4.66076	1.00034	1.26647	5.22238	5.92723	4.23028	3.66091	22.519	27.1425	18.0747	24.9283	40.5936	52.0708	1.24389	1.08264	4.75152	5.96592	19.2727	13.8401	7.79071	8.7044	14.3975	13.6517	0.333043	0.334336
[truncated: 10 more columns]
